# Supplementary material for: Preparation of carbon coated MoS2 flower-like nanostructure with self-assembled nanosheets as high-performance lithium-ion battery anodes
Source: Royal Society of Chemistry journal article supplement (doi:10.1039/c4ta01247j), 2014-01-01
Supplement: c4ta01247j1.pdf [file c4ta01247j1.pdf]

## Preparation of carbon coated MoS<sub>2</sub> flower-like nanostructure with self-assembled nanosheets as high-performance lithium-ion battery anodes

Shan Hu,<sup>ab</sup> Wen Chen,<sup>\*a</sup> Jing Zhou,<sup>a</sup> Fei Yin,<sup>c</sup> Evan Uchaker,<sup>b</sup> Qifeng Zhang,<sup>b</sup> and  
Guozhong Cao<sup>\*b</sup>

<sup>a</sup> State Key Laboratory of Advanced Technology for Materials Synthesis and Processing, School of Materials Science and Engineering, Wuhan University of Technology (WUT), Wuhan, 430070, PR China. E-mail: [chenw@whut.edu.cn](mailto:chenw@whut.edu.cn); Tel.: +86-27-87651107; Fax: +86-27-87760129.

<sup>b</sup> Department of Materials Science and Engineering, University of Washington, Seattle, Washington, 98195, USA. E-mail: [gzcao@u.washington.edu](mailto:gzcao@u.washington.edu); Tel.: +1-206-616-9084.

<sup>c</sup> Department of Mechanical Engineering Technology, Purdue University, West Lafayette, Indiana, 47906, USA.

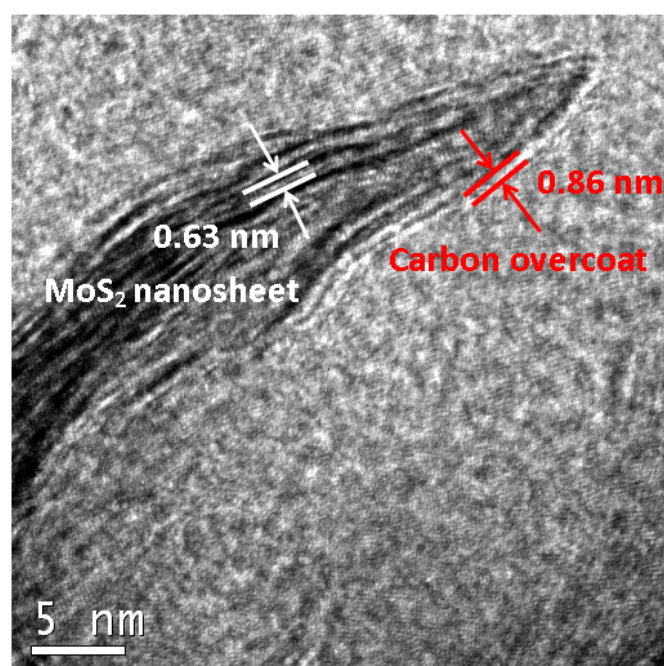

Figure S1. TEM image of the C@MoS<sub>2</sub> (2:1) composites demonstrates the MoS<sub>2</sub> nanosheet with a carbon-coated shell.

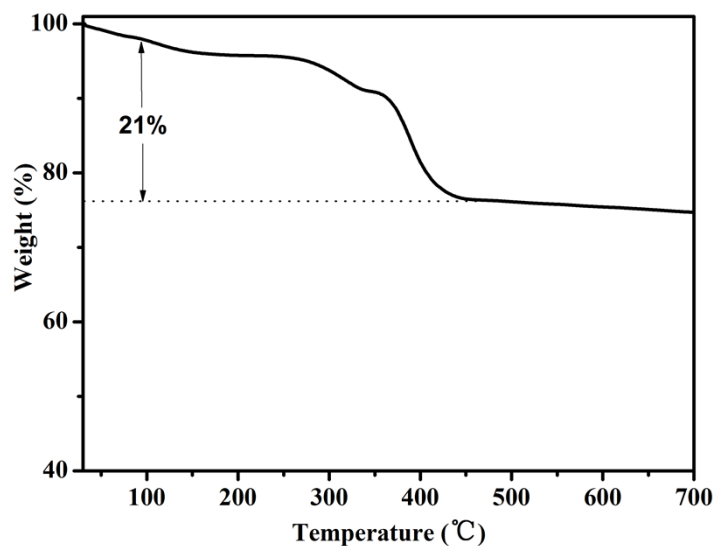

Figure S2. TGA curve of the C@MoS<sub>2</sub> (2:1) composites at 5 °C min<sup>-1</sup> in air.

The first weight loss below 100 °C is mostly attributed to water evaporation. So the weight was normalized at 100 °C. The weight gain from 300 °C to 400 °C is due to the oxidation of MoS<sub>2</sub> to MoO<sub>3</sub>. The other weight loss occurs at approximately 400 °C, caused by the combustion of the carbon. The weight fraction of MoS<sub>2</sub> in the initial sample can be easily estimated to be about 83.3% by assuming that the remaining product after TGA is pure MoO<sub>3</sub> at 400 °C.

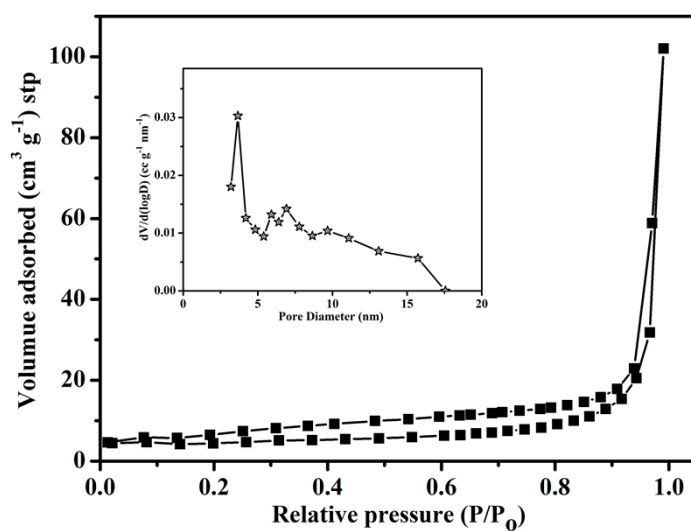

Figure S3. The N<sub>2</sub> adsorption-desorption isotherm of the prepared C@MoS<sub>2</sub> (2:1).

Insert: The corresponding pore size distribution.

N<sub>2</sub> adsorption/desorption measurement shows that the C@MoS<sub>2</sub> (2:1) composites possess a Brunauer-Emmett-Teller (BET) specific surface area of ca. 31 m<sup>2</sup> g<sup>-1</sup>, and pore size mainly centered at 4 nm, which is in the mesoporous range.

The average particle size of the C@MoS<sub>2</sub> (2:1) is estimated to be 50 nm. The density of MoS<sub>2</sub> is 5.06 g cm<sup>-3</sup>. Gas-adsorption derived surface areas (31 m<sup>2</sup> g<sup>-1</sup>) are higher than the calculated surface areas (24 m<sup>2</sup> g<sup>-1</sup>). The increase in surface area with increasing carbon content is attributed to the porous nature of amorphous carbon.

$$S = \pi d^2 = 3.14 * (5 * 10^{-6})^2 = 7.85 * 10^{-11} \text{ cm}^2$$

$$V = \frac{\pi d^3}{6} = \frac{3.14 * (5 * 10^{-6})^3}{6} = 6.54 * 10^{-17} \text{ cm}^3$$

$$S_w = \frac{S}{\rho V} = \frac{7.85 * 10^{-11}}{5.06 * 6.54 * 10^{-17}} = 23.7 \text{ m}^2 \text{ g}^{-1}$$
